# Supplementary material
Source: ML conference proceedings conference paper supplement (https://proceedings.neurips.cc/paper_files/paper/2019/hash/0266e33d3f546cb5436a10798e657d97-Abstract.html)
Supplement: Supplementary file [file 0266e33d3f546cb5436a10798e657d97-Supplemental.zip]

---

# Zero-Shot Semantic Segmentation (Supplementary Material)

---

**Maxime Bucher**  
valeo.ai  
maxime.bucher@valeo.com

**Tuan-Hung Vu**  
valeo.ai  
tuan-hung.vu@valeo.com

**Matthieu Cord**  
Sorbonne Université  
valeo.ai  
matthieu.cord@lip6.fr

**Patrick Pérez**  
valeo.ai  
patrick.perez@valeo.com

In this document, we provide qualitative examples to assess visually the behavior of ZS3Net and ZS5Net.

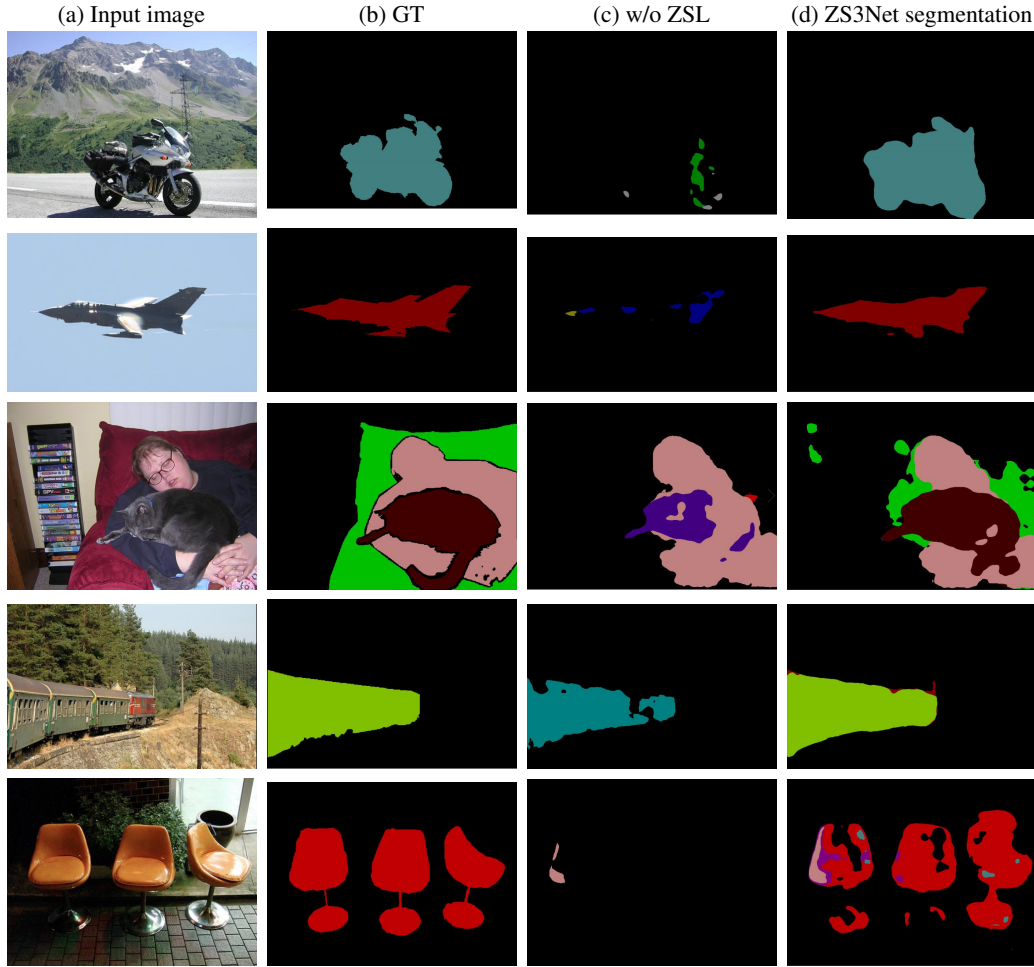

Figure 1: **Additional qualitative results on Pascal-VOC.** From top to bottom, results of the 2-, 4-, 6-, 8- and 10-unseen set-ups. (a) Input image, (b) semantic segmentation ground-truth, (c) segmentation without zero-shot learning, (d) results with proposed ZS3Net. Unseen classes: motorbike plane cat sofa train chair; Some seen classes: bicycle boat dog person background. Best seen in colors.

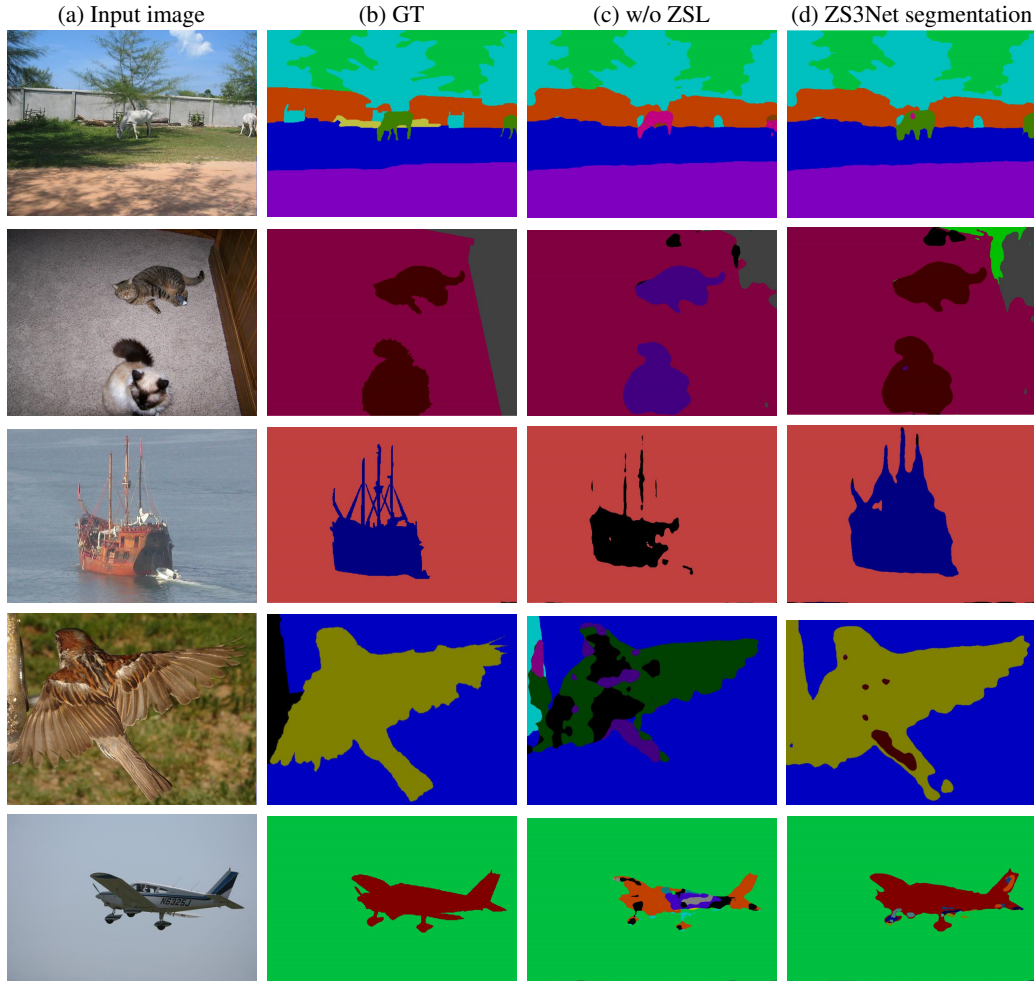

Figure 2: **Additional qualitative results on Pascal-Context.** From top to bottom, results of the 2-, 4-, 6-, 8- and 10-unseen set-ups. (a) Input image, (b) semantic segmentation ground-truth, (c) segmentation without zero-shot learning, (d) results with proposed ZS3Net. Unseen classes: **cow** **cat** **boat** **bird** **plane**; Some seen classes: **horse** **dog** **background** **sky**. Best viewed in colors.

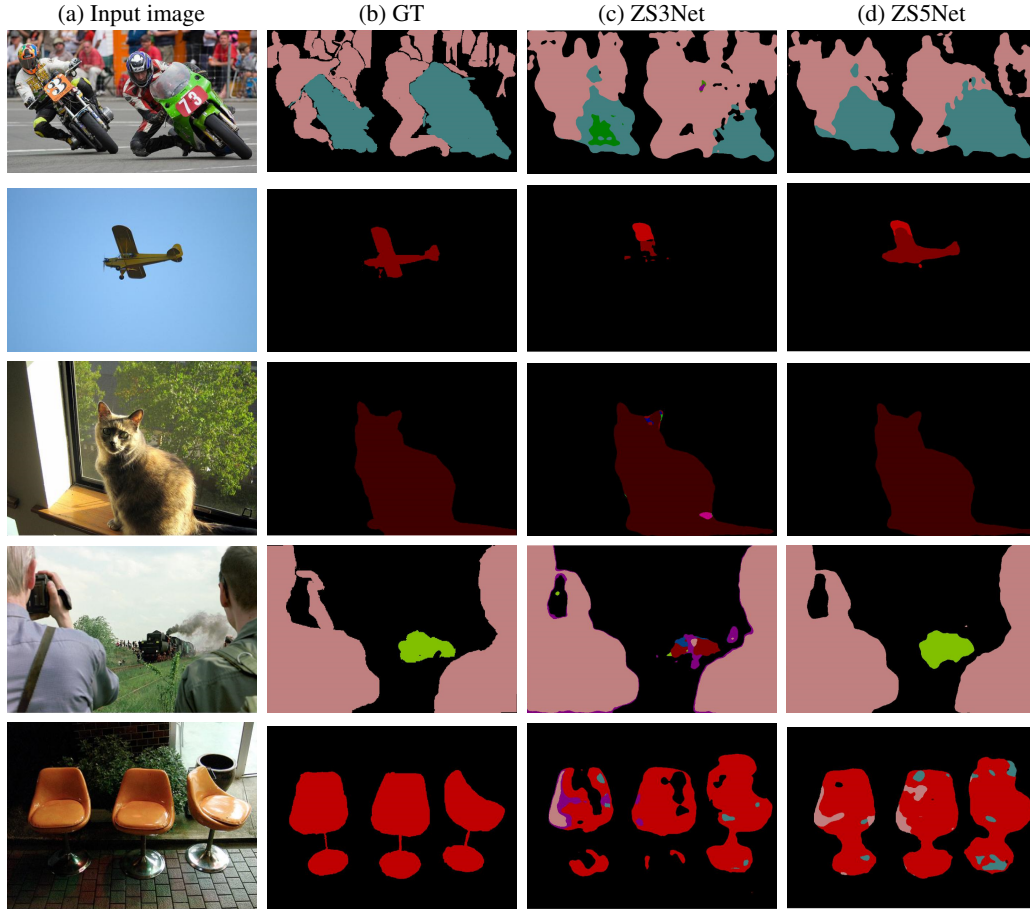

Figure 3: **Additional qualitative results with self-training on Pascal-VOC.** From top to bottom, results of the 2-, 4-, 6-, 8- and 10-unseen set-ups. (a) Input image, (b) semantic segmentation ground-truth, (c) segmentation with ZS3Net, (d) result with additional self-training (ZS5Net). Unseen classes: **motorbike** **plane** **cat** **train** **chair**; Some seen classes: **bicycle** **boat** **person** **background**. Best seen in colors.



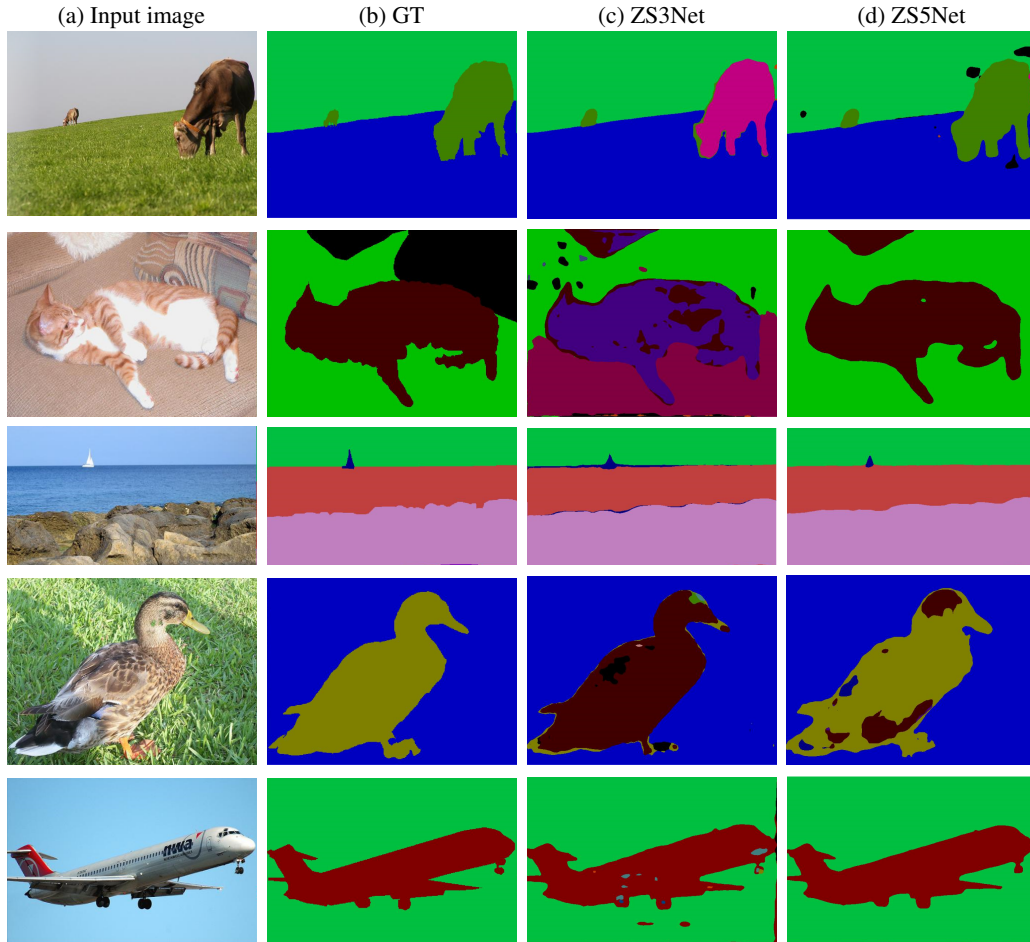

Figure 4: **Additional qualitative results with self-training on Pascal-Context.** From top to bottom, results of the 2-, 4-, 6-, 8- and 10-unseen set-ups. (a) Input image, (b) semantic segmentation ground-truth, (c) segmentation with ZS3Net, (d) result with additional self-training (ZS5Net). Unseen classes: cow cat sofa boat bird plane; Some seen classes: horse dog background sky. Best viewed in colors.
